# Supplementary material for: Impact of Adding Polysaccharides on the Stability of Egg Yolk/Fish Oil Emulsions under Accelerated Shelf-Life Conditions
Source: MDPI journal article supplement (doi:10.3390/molecules26134020), 2021-06-30
Supplement: s1 [file s1]

## Supplementary material

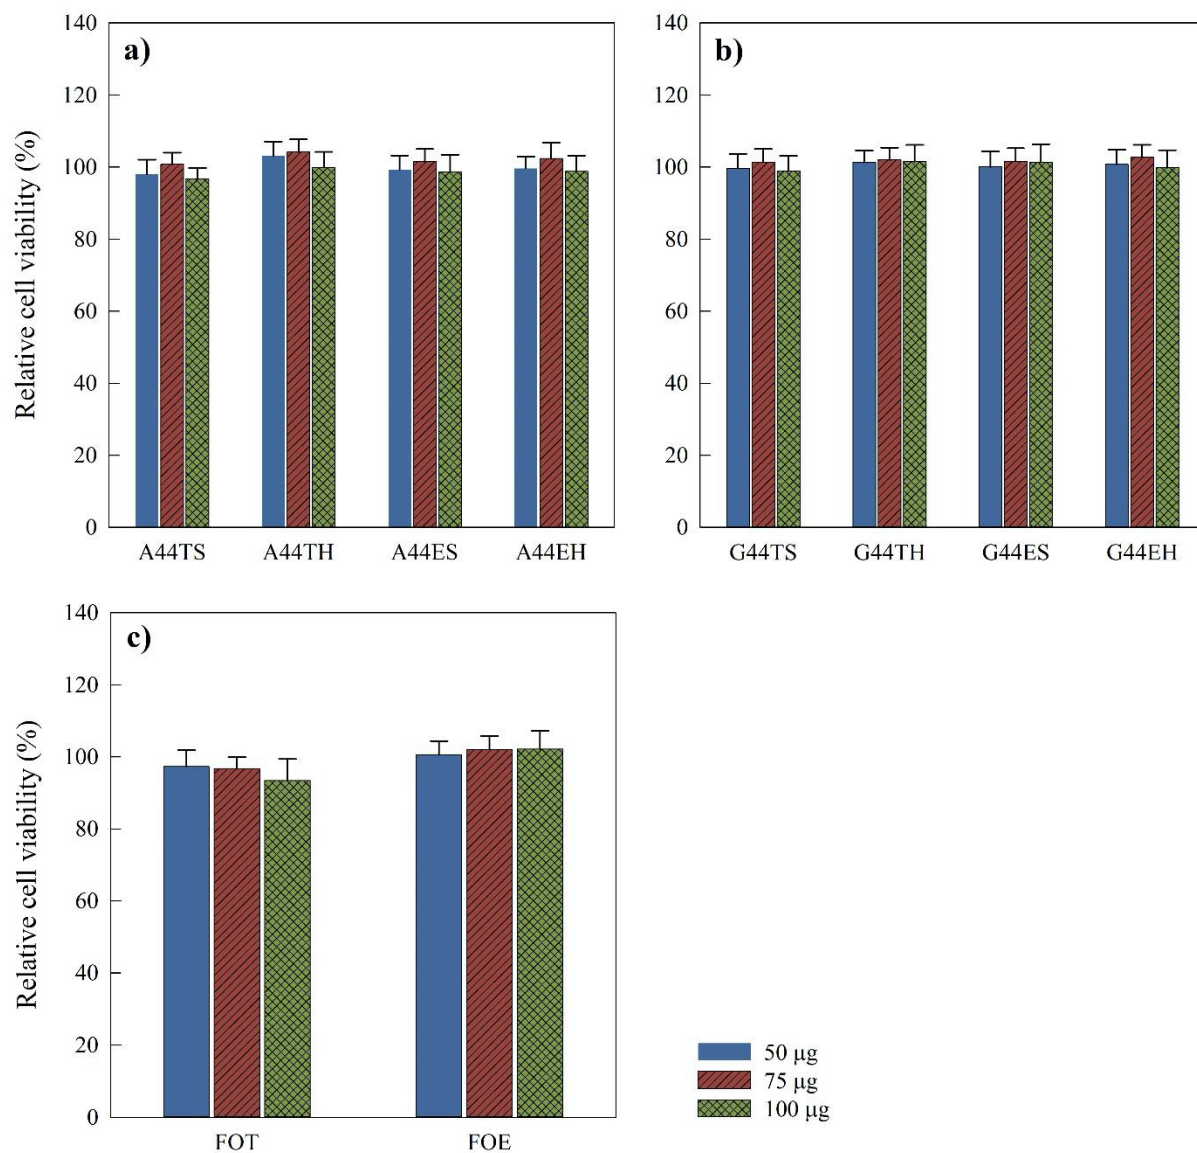

Figure S1. Toxicity of egg yolk/fish oil triglycerides (T) or ethyl esters (E) emulsions containing gum arabic (A) or gum guar (G) formed by primary (S) and secondary (H) homogenization, and the non-encapsulated fish oil triglycerides or ethyl esters controls (FOT and FOE, respectively) at 3 different concentrations (µg fish oil / mL medium) at day 0. Each bar represents the mean  $\pm$  standard error of four to six replications. No significant differences with the blank (medium without emulsions) were found at  $\alpha = 0.05$ .
